# Supplementary material for: High Throughput Kinomic Profiling of Human Clear Cell Renal Cell Carcinoma Identifies Kinase Activity Dependent Molecular Subtypes
Source: PubMed Central journal article supplement (PMC4583516; doi:10.1371/journal.pone.0139267), 2015-09-25
Supplement: pone.0139267.s001.pdf [file pone.0139267.s001.pdf]

**Supporting Table 1.** Detailed patient characteristics

| ID     | Age at Diagnosis | Gender (1=M, 0=F) | TNM         | Stage at diagnosis | Progressed (0=no, 1=yes) | % tumor | % necrosis |
|--------|------------------|-------------------|-------------|--------------------|--------------------------|---------|------------|
| RCC 1  | 62               | 1                 | T3bN0M0     | 3                  | 0                        | 10      | 0          |
| RCC 10 | 84               | 1                 | T1aN0M0     | 1                  | 0                        | <10     | 0          |
| RCC 11 | 55               | 0                 | T3bN0M0     | 3                  | 1                        | 100     | 80         |
| RCC 12 | 33               | 1                 | T1N0M0      | 1                  | 0                        | 60      | 20         |
| RCC 13 | 72               | 0                 | T3aN0M0     | 4                  | 0                        | 100     | 30         |
| RCC 15 | 73               | 1                 | T1N0M0      | 1                  | 0                        | 20      | 10         |
| RCC 16 | 69               | 0                 | T1N0M0      | 1                  | 0                        | 40      | 0          |
| RCC 20 | 77               | 1                 | T3aN2M0     | 3                  | 1                        | 90      | 10         |
| RCC 21 | 61               | 1                 | T1N0M0      | 1                  | 0                        | 100     | 20         |
| RCC 22 | 56               | 1                 | T1aN0M0     | 1                  | 0                        | 90      | 10         |
| RCC 23 | 54               | 1                 | T3aN0M0     | 3                  | 0                        | 100     | 10         |
| RCC 24 | 85               | 1                 | T1aN0M0     | 3                  | 1                        | 80      | 10         |
| RCC 25 | 66               | 1                 | T3aN0M0     | 3                  | 1                        | 80      | 70         |
| RCC 27 | 46               | 0                 | T1aN0M0     | 3                  | 0                        | 90      | 50         |
| RCC 28 | 55               | 1                 | T1bN0M0     | 1                  | 0                        | 30      | 50         |
| RCC 3  | 78               | 1                 | T1aN0M0     | 3                  | 0                        | 70      | 0          |
| RCC 30 | 60               | 1                 | T1bN0M0     | 1                  | 0                        | 100     | 10         |
| RCC 35 | 67               | 1                 | T1N0M0      | 1                  | 1                        |         |            |
| RCC 4  | 54               | 1                 | T3aN0M0     | 3                  | 0                        | 80      | 0          |
| RCC 46 | 47               | 1                 | T1N0M0      | 1                  | 0                        | 60      | 20         |
| RCC 47 | 64               | 1                 | T1aN0M0     | 1                  | 0                        | 100     | 10         |
| RCC 50 | 47               | 0                 | unavailable | 1                  | 0                        |         |            |
| RCC 55 | 68               | 1                 | T3aN0M0     | 3                  | 1                        | 70      | 50         |
| RCC 57 | 68               | 1                 | T1bN0M0     | 1                  | 0                        | 80      | 0          |
| RCC 59 | 71               | 1                 | T3N0M0      | 3                  | 0                        | 100     | 50         |
| RCC 60 | 53               | 0                 | T3bN0M0     | 3                  | 0                        | 10      | 0          |
| RCC 62 | 59               | 1                 | T1N0M0      | 1                  | 0                        | 100     | 10         |
| RCC 63 | 62               | 1                 | T3N0M0      | 3                  | 0                        | 100     | 70         |
| RCC 7  | 56               | 1                 | T3bN0M0     | 3                  | 1                        | 100     | 20         |
| RCC 75 | 54               | 0                 | T2aN0M0     | 2                  | 0                        | 100     | 20         |
| RCC 76 | 51               | 0                 | T1N0M0      | 1                  | 0                        | 90      | 10         |
| RCC 79 | 61               | 1                 | T3bN0M0     | 3                  | 1                        | 100     | 60         |
| RCC 80 | 67               | 1                 | T2N0M0      | 3                  | 0                        | 100     | 50         |
| RCC 81 | 65               | 0                 | T1bN1M0     | 3                  | 0                        | 30      | 20         |
| RCC 82 | 56               | 1                 | T3bN0M0     | 4                  | 1                        | 90      | 20         |
| RCC 83 | 37               | 0                 | T1N0M0      | 1                  | 0                        | 70      | 20         |
| RCC 84 | 60               | 1                 | T1aN0M0     | 3                  | 0                        | 100     | 20         |
| RCC 88 | 61               | 1                 | unavailable | 1                  | 0                        |         |            |
| RCC 90 | 67               | 0                 | unavailable | 1                  | 0                        |         |            |
| RCC 92 | 57               | 0                 | unavailable | 1                  | 0                        |         |            |
| RCC 94 | 64               | 1                 | unavailable | 1                  | 0                        |         |            |
