# Supplementary material for: High Throughput Kinomic Profiling of Human Clear Cell Renal Cell Carcinoma Identifies Kinase Activity Dependent Molecular Subtypes
Source: PubMed Central journal article supplement (PMC4583516; doi:10.1371/journal.pone.0139267), 2015-09-25
Supplement: pone.0139267.s003.pdf [file pone.0139267.s003.pdf]

# Supplemental Figure S1

| Top Ranked 'A' Processes                        | Top Ranked 'B' Processes                                 | Top Ranked 'C' Processes                                                    |
|-------------------------------------------------|----------------------------------------------------------|-----------------------------------------------------------------------------|
| Inflammation_MIF signaling                      | Reproduction_GnRH signaling pathway                      | Immune response_Phagocytosis                                                |
| Inflammation_Amphoterin signaling               | Reproduction_Gonadotropin regulation                     | Apoptosis_Anti-Apoptosis mediated by external signals via PI3K/AKT          |
| DNA damage_Checkpoint                           | Neurophysiological process_Long-term potentiation        | Immune response_Phagosome in antigen presentation                           |
| Cell cycle_G1-S Interleukin regulation          | Signal Transduction_Cholecystokinin signaling            | Cell adhesion_Platelet aggregation                                          |
| Development_Hemopoiesis, Erythropoietin pathway | Translation_Regulation of initiation                     | Cell adhesion_Glycoconjugates                                               |
| Inflammation_IgE signaling                      | Development_Melanocyte development and pigmentation      | Inflammation_NK cell cytotoxicity                                           |
| Immune response_BCR pathway                     | Inflammation_Histamine signaling                         | Apoptosis_Anti-Apoptosis mediated by external signals via MAPK and JAK/STAT |
| Inflammation_TREM1 signaling                    | Neurophysiological process_Transmission of nerve impulse | Cell adhesion_Leucocyte chemotaxis                                          |
| Development_Neuromuscular junction              | Neurophysiological process_Circadian rhythm              | Development_Hemopoiesis, Erythropoietin pathway                             |
| Immune response_TCR signaling                   | Muscle contraction_Relaxin signaling                     | Immune response_BCR pathway                                                 |
