# Supplementary material for: High Throughput Kinomic Profiling of Human Clear Cell Renal Cell Carcinoma Identifies Kinase Activity Dependent Molecular Subtypes
Source: PubMed Central journal article supplement (PMC4583516; doi:10.1371/journal.pone.0139267), 2015-09-25
Supplement: pone.0139267.s004.pdf [file pone.0139267.s004.pdf]

## Supplemental Figure S2

| <b>'A' Kinases</b> | Uniprot | Hits   | Score    | %hits   |
|--------------------|---------|--------|----------|---------|
| PFTAIRE1 (PFTK1)   | O94921  | 1.6665 | 5201.147 | 41.6625 |
| ATR                | Q13535  | 1.3332 | 5111.489 | 33.33   |
| DNAPK/PRKDC        | P78527  | 1.3332 | 4327.567 | 33.33   |
| JNK1 (MAPK8)       | P45983  | 1.3332 | 4275.572 | 33.33   |
| JNK3 (MAPK10)      | P53779  | 1.3332 | 4275.572 | 33.33   |
| ERK1               | P27361  | 1.3332 | 4031.597 | 33.33   |
| ERK2 (MAPK1)       | P28482  | 1.3332 | 3988.934 | 33.33   |
| CDK1 (CDC2)        | P06493  | 1.3332 | 3964.937 | 33.33   |
| JNK2 (MAPK9)       | P45984  | 1.3332 | 3659.634 | 33.33   |

| <b>'B' Kinases</b> | Uniprot | Hits | Score | %hits |
|--------------------|---------|------|-------|-------|
| PKG1 (PRKG1)       | Q13976  | 6    | 20400 | 75    |
| Pim3 (AL549548)    | P58750  | 6    | 14316 | 75    |
| PKG2 (PRKG2)       | Q13237  | 5    | 15225 | 62.5  |
| PKACa (PRKACA)     | P17612  | 5    | 11950 | 62.5  |
| MSK1 (RPS6KA5)     | O75582  | 4    | 10264 | 50    |
| p70S6Kb (RPS6KB2)  | Q9UBS0  | 4    | 7468  | 50    |
| PRKX               | P51817  | 3    | 5730  | 37.5  |
| PKACb PRKACB       | P22694  | 3    | 5658  | 37.5  |

| <b>'C' Kinases</b> | Uniprot | Hits | Score   | %hits |
|--------------------|---------|------|---------|-------|
| SRC                | P12931  | 7.5  | 60660   | 75    |
| YES1               | P07947  | 7    | 56280   | 70    |
| BLK                | P51451  | 6    | 36360   | 60    |
| PYK2 (PTK2B)       | Q14289  | 5    | 34950   | 50    |
| HCK                | P08631  | 5    | 34860   | 50    |
| FYN                | P06241  | 5    | 27120   | 50    |
| SYK                | P43405  | 5    | 25265   | 50    |
| ERBB3              | P21860  | 4.5  | 14350.5 | 45    |
| ARG (ABL2)         | P42684  | 4    | 17096   | 40    |
| LYN                | P07948  | 4    | 16004   | 40    |
| CTK (MATK)         | P42679  | 4    | 9676    | 40    |
| BRK                | Q13882  | 3    | 8700    | 30    |
| AXL                | P30530  | 3    | 7479    | 30    |
| LCK                | P06239  | 3    | 7323    | 30    |
| FGR                | P09769  | 3    | 6327    | 30    |
