# Supplementary material for: High Throughput Kinomic Profiling of Human Clear Cell Renal Cell Carcinoma Identifies Kinase Activity Dependent Molecular Subtypes
Source: PubMed Central journal article supplement (PMC4583516; doi:10.1371/journal.pone.0139267), 2015-09-25

# Supplemental Figure S3

**A**

| PTK Peptides    | Change with Tumor |
|-----------------|-------------------|
| AMPE_5_17 *     | 0.186             |
| DDR1_506_518    | 2.135             |
| EPHB1_921_933   | 0.621             |
| NPT2A_501_513   | 0.25              |
| PLCG1_1246_1258 | -0.522            |

**B**

| Kinase         | Uniprot | Hits | % Hits |
|----------------|---------|------|--------|
| ERBB2          | P04626  | 6    | 100    |
| ERBB4          | Q15303  | 5    | 83.33  |
| MER<br>(MERTK) | Q12866  | 5    | 83.33  |
| ABL            | P00519  | 3    | 50     |

**C**

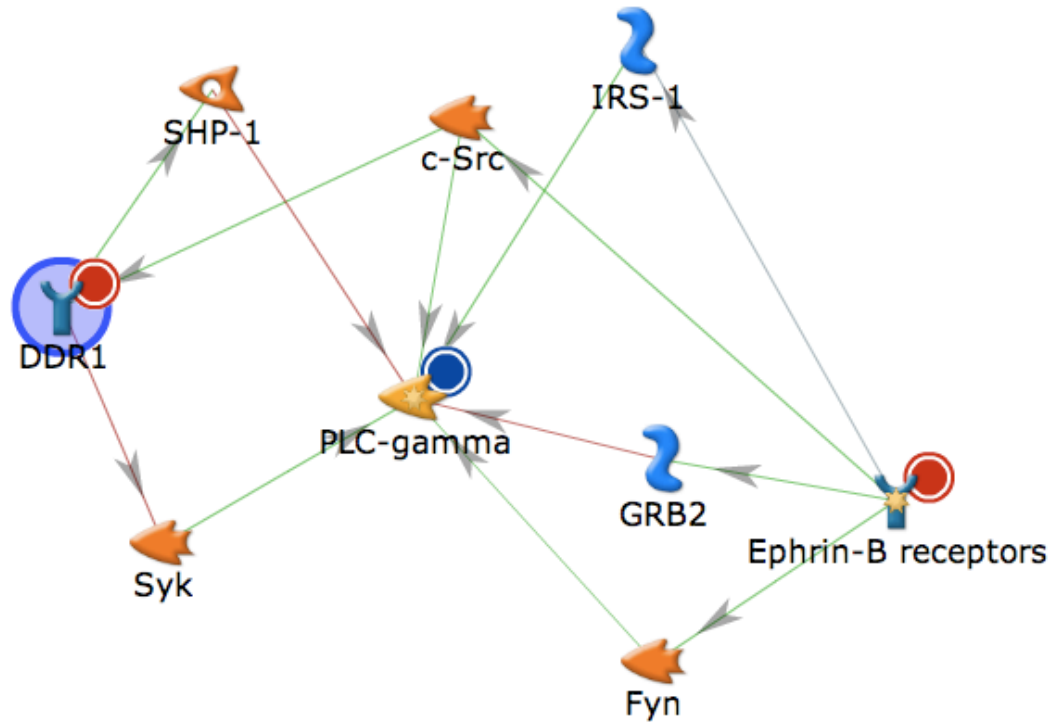

Supplement: pone.0139267.s005.pdf [file pone.0139267.s005.pdf]
